# Supplementary material for: Surface Functionalization by Stimuli-Sensitive Microgels for Effective Enzyme Uptake and Rational Design of Biosensor Setups
Source: PubMed Central journal article supplement (PMC6403641; doi:10.3390/polym10070791), 2018-07-19
Supplement: polymers-10-00791-s001.pdf [file polymers-10-00791-s001.pdf]

Supplementary

Larisa V. Sigolaeva <sup>1,\*</sup>, Dmitry V. Pergushov <sup>1</sup>, Marina Oelmann <sup>2</sup>, Simona Schwarz <sup>2</sup>,  
Monia Brugnoli <sup>3</sup>, Ilya N. Kurochkin <sup>1,4</sup>, Felix A. Plamper <sup>3</sup>, Andreas Fery <sup>2,5</sup> and  
Walter Richtering <sup>3</sup>

- <sup>1</sup> Department of Chemistry, M.V. Lomonosov Moscow State University, Leninskie Gory 1/3, 119991 Moscow, Russia; lsigolaeva@belozersky.msu.ru (L.V.S.); pergush@belozersky.msu.ru (D.V.P.); ikur@genebee.msu.ru (I.N.K.)
  - <sup>2</sup> Leibniz-Institut für Polymerforschung Dresden e.V., Hohe Str. 6, 01069 Dresden, Germany; oelmann@ipfdd.de (M.O.); simsch@ipfdd.de (S.S.); fery@ipfdd.de (A.F.)
  - <sup>3</sup> Institute of Physical Chemistry II, RWTH Aachen University, Landoltweg 2, 52056 Aachen, Germany; brugnoli@pc.rwth-aachen.de (M.B.); plamper@pc.rwth-aachen.de (F.A.P.); richtering@rwth-aachen.de (W.R.)
  - <sup>4</sup> N.M. Emanuel Institute of Biochemical Physics Russian Academy of Sciences, Kosygina Str. 4, Moscow, 119334 Russia
  - <sup>5</sup> Technical University of Dresden, Physical Chemistry of Polymeric Materials, Hohe Str. 6, 01069 Dresden, Germany
- \* Correspondence: lsigolaeva@belozersky.msu.ru; Tel.: +7-495-939-40-42

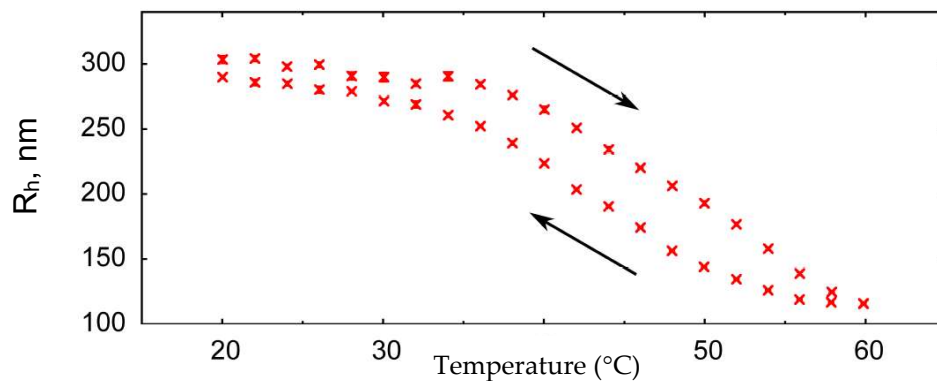

**Figure S1.** The temperature dependence of the hydrodynamic radius of poly(*N*-isopropylacrylamide-*co*-*N*-[3-(dimethylamino)propyl]methacrylamide) (P[NIPAM-*co*-DMAPMA]) microgel particles.

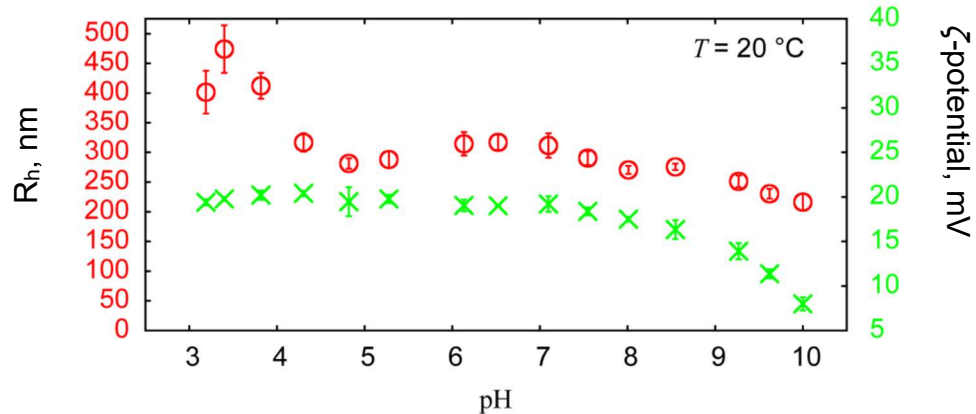

**Figure S2.** The pH-dependences of the hydrodynamic radius and  $\zeta$ -potential of P(NIPAM-*co*-DMAPMA) microgel particles.

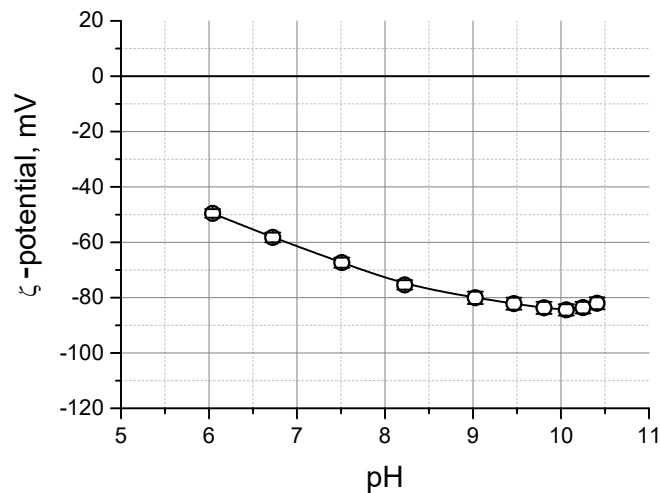

**Figure S3.** The pH-dependence of the surface  $\zeta$ -potential of the poly(vinyl chloride) (PVC) film as measured by electrokinetic analysis (EKA).

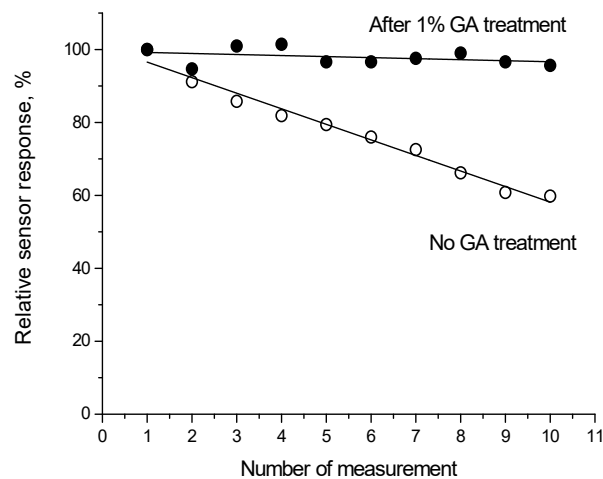

**Figure S4.** The relative biosensor responses of the screen-printed electrodes (SPE)/MnO<sub>2</sub>/P(NIPAM-co-APMA)/ChO construct (open circles) and the SPE/MnO<sub>2</sub>/P(NIPAM-co-APMA)/ChO construct cross-linked with glutar aldehyde (GA) (solid circles) to consecutive additions of choline solution, with the concentration of  $5 \times 10^{-5}$  M. The operational stability was characterized quantitatively as a percentage of change of the biosensor response per a single measurement, and was calculated according to the formula:  $\Delta I = 100\% \times \text{tg}I/I_1$ , where  $\text{tg}I$  is the slope of the dependence of the biosensor response on the number of measurements, normalized to the initial biosensor response  $I_1$  and given in percent.
